# Supplementary figures and images for: Gender, Socioeconomic Status, Race, and Ethnic Disparities in Bystander Cardiopulmonary Resuscitation and Education—A Scoping Review
Source: MDPI journal article supplement (doi:10.3390/healthcare12040456), 2024-02-10

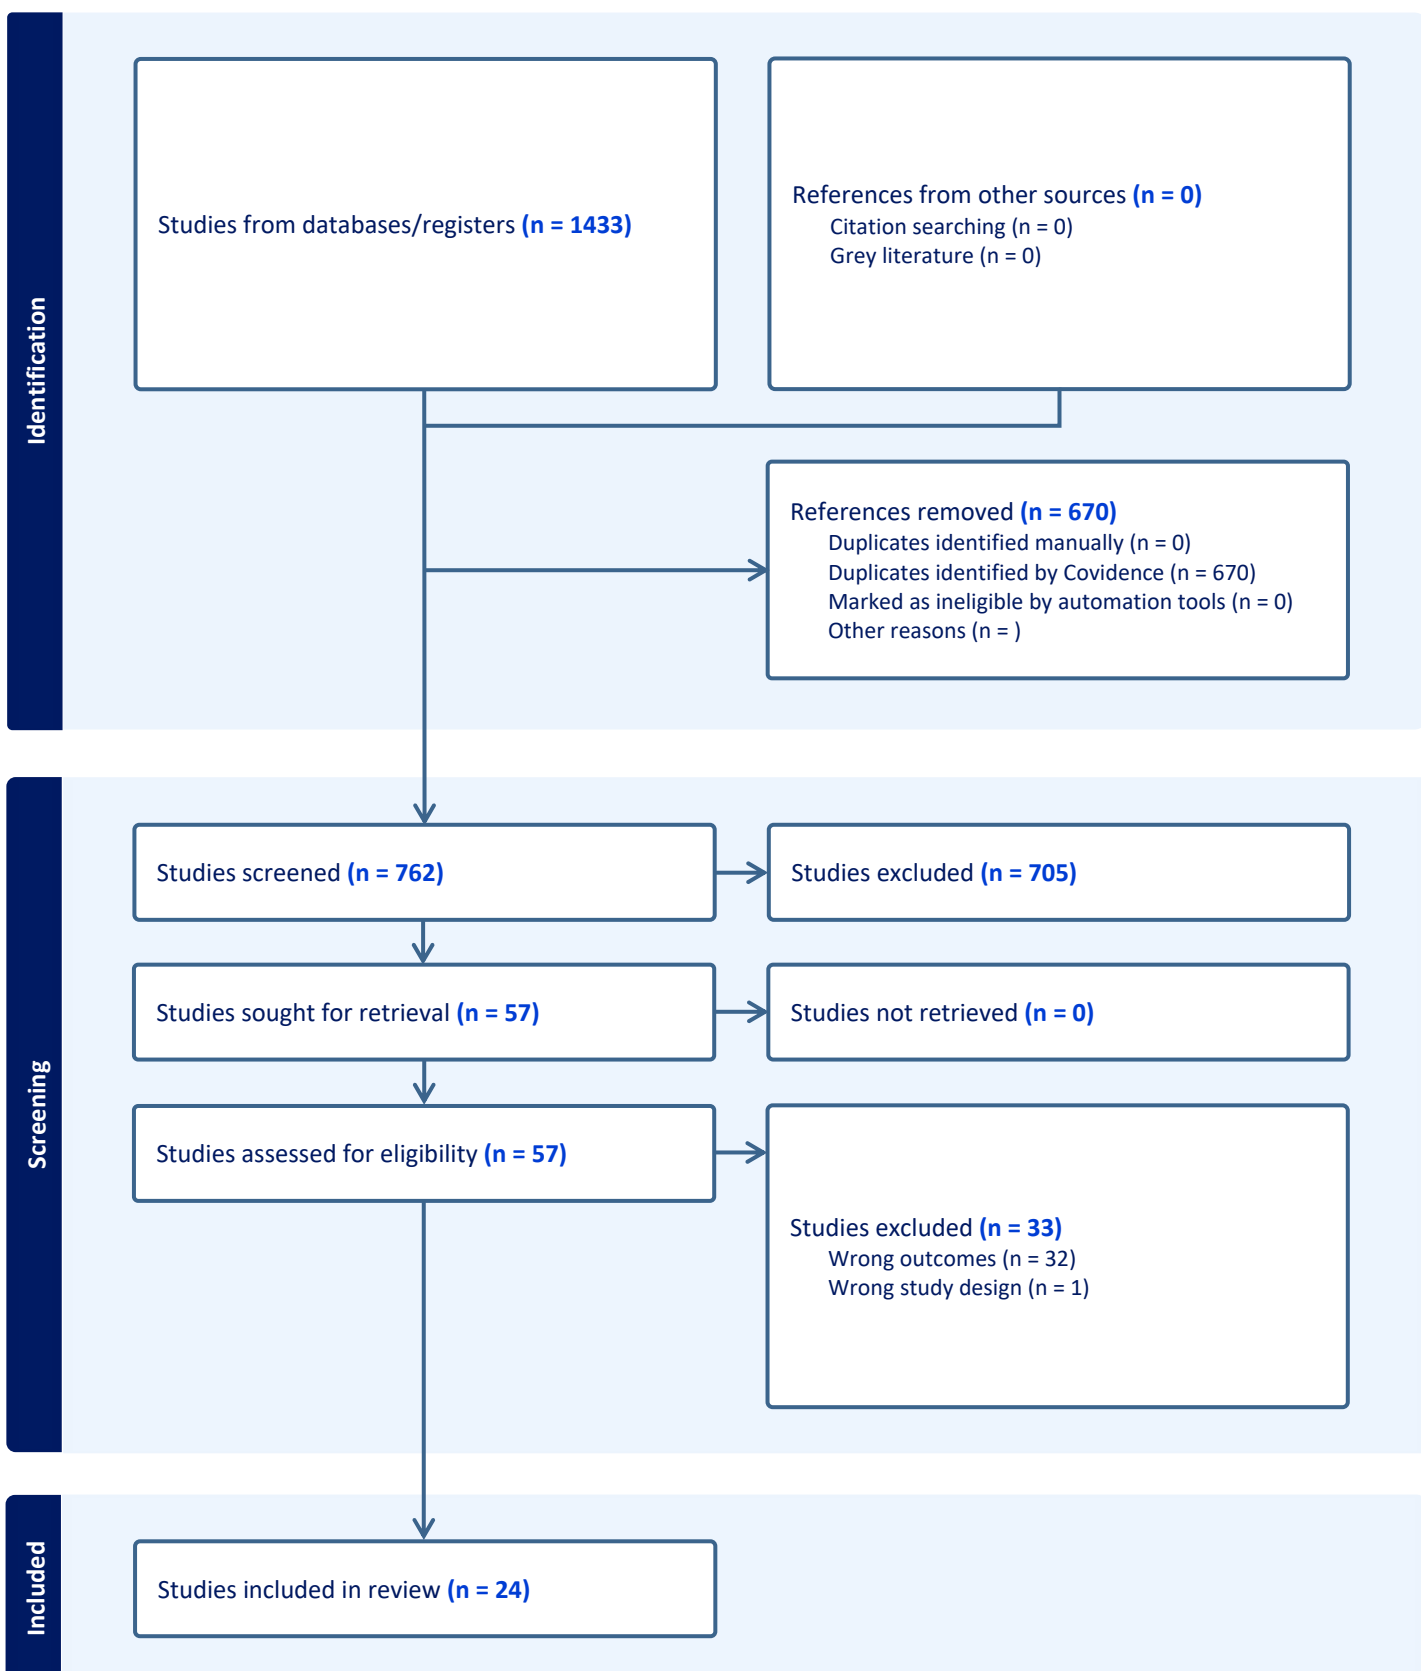

Included studies ongoing (n = 0)  
Studies awaiting classification (n = 0)

Supplement: s1 [file s1]
